# Supplementary material
Source: HighWire-hosted journal article supplement (https://bmjopen.bmj.com/content/9/3/e024376)
Supplement: inline-supplementary-material-1 [file inline-supplementary-material-1.pdf]

## **The multidisciplinary approach to the prevention of bisphosphonate related osteonecrosis of the jaw (BRONJ). A Qualitative study into the attitudes and perceptions of patients (MAP-BRONJ)**

### **Topic Guide**

This study aims to explore the attitudes and perceptions of patients towards the multidisciplinary prevention of bisphosphonate related osteonecrosis of the jaw.

The following guide outlines the key areas for exploration during the interview.

#### **Aims and objectives**

To explore the attitudes and perceptions of patients towards the roles of the pharmacist, general practitioner and dentist in the prevention of Bisphosphonate Related Osteonecrosis of the Jaw (BRONJ).

To explore the barriers or enablers to optimising the risk prevention of BRONJ

To explore the attitudes and perceptions of patients about their broader priorities during counselling on medication

#### **Introduction**

*Aim: To introduce the research and set the context for the proceeding discussion*

- Introduce self: University of Sunderland, MAP-BRONJ study, why I am here
- Introduce the study: what it is about, who it is funded by
- Talk through key points
  - This will be a conversation where I will ask you questions
  - It will last between 30 and 60 minutes
  - There are no right or wrong answers
  - You don't have to answer all of the questions if you don't want to, just let me know that you want to move on
  - Participation is voluntary and participant can withdraw at any time
- Confidentiality/ anonymity
  - Transcripts will be anonymised
  - In report writing, any quotes won't be identified as being you
- The interview will be audio recorded
  - The recording will be kept secure, only accessed by the four researchers working on the project, and will be kept for 10 years as per policy
- I've brought the voucher for participation with me, so I'll give that to you after the interview
- This piece of paper is just to help me remember what questions I want to ask you, and I may make some brief notes during the interview to remind me to go back to something you said later on if that's ok
- Does the participant have any questions?

## The multidisciplinary approach to the prevention of bisphosphonate related osteonecrosis of the jaw (BRONJ). A Qualitative study into the attitudes and perceptions of patients (MAP-BRONJ)

### All Participants

#### **Background of participant**

*Prompts: age, employment, PMx, DHx, dental history, regular pharmacy, regular GP*

#### **When you have been started on a new medicine, what do you want to know**

*Prompts: priorities, side-effects, risks, indications, benefit, decision making process*

#### **The role of the GP when starting new medicines**

*Prompts: experiences, role, expectations*

#### **The role of the pharmacist when starting new medicines**

*Prompts: experiences, role, expectations, MUR/NMS*

Osteonecrosis of the jaw has been associated with bisphosphonate therapy. It can be difficult to treat and in many cases potentially preventable, the most recent guidelines recommend that healthcare professionals should work together to do this. Ideally patients should be dentally fit before starting these medicines and should have any dental work carried out before starting treatment and maintain good dental health while taking these drugs.

### All Participants

#### **The role of the GP in this team**

*Prompts: role, responsibilities, expectations*

#### **The role of the pharmacist in this team**

*Prompts: role, responsibilities, expectations, MUR/NMS*

#### **The role of the dentist in this team**

*Prompts: experiences with dentists, role of the dentist, expectations*

#### **The role of the patient in this team**

*Prompts: roles and responsibilities, expectations*

#### **The role of the multidisciplinary team**

*Prompts: expectations, leadership, communication*

#### **Any barriers or facilitators to this from happening**

*Prompts: access to dentists, charges, fear, communication*

#### **Would this influence (or have influenced) your decision to take this medicine**

*Prompts: why, risk of not taking, balance risk*

## **The multidisciplinary approach to the prevention of bisphosphonate related osteonecrosis of the jaw (BRONJ). A Qualitative study into the attitudes and perceptions of patients (MAP-BRONJ)**

### **Patients with osteoporosis only**

**Tell me about your experiences of osteoporosis**

*Prompts: symptoms, diagnosis, management*

**Are you aware of the drugs that can be used to help patients with osteoporosis**

*Prompts: Who told you, offered drugs?*

### **Patients prescribed bisphosphonates only**

**Tell me about your experiences of taking bisphosphonates**

*Prompts: indication, history, administration, side-effects, efficacy*

**Were you aware that this condition was a potential side-effect of one of your medicines**

*Prompts: was this risk explained to you, who by, when*

**Did you have a dental check-up prior to treatment**

*Prompts: Was work carried out, advice given, was the dentist aware of the risk*

**Do you maintain regular dental check-ups**

*Prompts: Frequency, does the dentist know you're on a bisphosphonate,*

### **Patients with a diagnosis of BRONJ only**

**Tell me about your experiences of taking bisphosphonates**

*Prompts: indication, history, administration, side-effects, efficacy*

**Tell me about your diagnosis of osteonecrosis of the jaw**

*Prompts: presentation, diagnosis, management, current management*

**Tell me about how osteonecrosis of the jaw has affected your life**

*Prompts: impact on daily activities, pain, discomfort, ongoing management, psychological impact*

**Were you aware that this condition was a potential side-effect of one of your medicines**

*Prompts: was this risk explained to you, who by*

**Should you have been aware of this risk with this medicine**

*Prompts: should you have been, would you still have taken this medicine, how/who should make you aware of this*

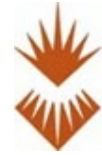

**The multidisciplinary approach to the prevention of bisphosphonate related osteonecrosis of the jaw (BRONJ). A Qualitative study into the attitudes and perceptions of patients (MAP-BRONJ)**

**Next steps**

- Thank the participant
- Do they have any remaining questions about the research
- Reassurance around confidentiality and anonymity
- Would they like their GP to be informed about their participation in the interview
- Provide with gift voucher
- If not, would they like to be informed about the outcomes of the research, and if so method for doing this
