# Supplementary material
Source: HighWire-hosted journal article supplement (https://bmjopen.bmj.com/content/9/3/e024376)
Supplement: inline-supplementary-material-3 [file inline-supplementary-material-3.pdf]

## Invitation letter for interviews – patients with BRONJ

DATE

TITLE FIRST SURNAME  
ADDRESS LINE 1  
ADDRESS LINE 2  
POST CODE

Dear [TITLE] [FIRST NAME] [LAST NAME],

### **I WOULD LIKE TO ASK FOR YOUR HELP**

Academics who are doing research at the University of Sunderland and Newcastle University have asked for my help to find patients to take part in a study. You have previously been diagnosed with a condition called osteonecrosis of the jaw and they would really like to talk to you about it.

The research study being carried out is called MAP-BRONJ. This stands for 'The multidisciplinary approach to the prevention of bisphosphonate related osteonecrosis of the jaw. A qualitative study into the attitudes and perceptions of patient'.

Osteonecrosis of the jaw is a rare side effect of a medicine called a bisphosphonate. We would like to speak to patients who have this condition to get a better understanding of how this has impacted on your life and to get your thoughts on how healthcare professionals can work together to prevent other patients from having this same problem.

If you have any worries about your condition then please make an appointment with your usual doctor and they can give you the correct advice.

If you would like to take part in this study or want to know more about it, please read the information sheet which comes with this letter.

Kind regards,

[Dentist/GP]

## Invitation letter for interviews – patients with BRONJ

I would like find out more about the **MAP-BRONJ** and I am happy for a member of the research team to contact me

**Contact details** *(Please enter your contact details below)*

Title: \_\_\_\_\_ Mr/Mrs/Ms/Miss *(please delete as appropriate)*

Name: \_\_\_\_\_

Telephone contact number: \_\_\_\_\_

A convenient time to call is: Between \_\_\_\_\_ and \_\_\_\_\_

**Please return this slip in the envelope provided. A member of research team will contact you on the contact number provided above.**
