# Supplementary material
Source: HighWire-hosted journal article supplement (https://bmjopen.bmj.com/content/9/3/e024376)
Supplement: inline-supplementary-material-4 [file inline-supplementary-material-4.pdf]

## Invitation letter for interviews – patients with osteoporosis

DATE

TITLE FIRST SURNAME  
ADDRESS LINE 1  
ADDRESS LINE 2  
POST CODE

Dear [TITLE] [FIRST NAME] [LAST NAME],

### **I WOULD LIKE TO ASK FOR YOUR HELP**

Academics who are doing research at the University of Sunderland and Newcastle University have asked for my help to find patients to take part in a study. You have previously been diagnosed with a condition called osteoporosis that affects your bones and they would really like to talk to you about it.

The research study being carried out is called MAP-BRONJ. This stands for 'The multidisciplinary approach to the prevention of bisphosphonate related osteonecrosis of the jaw. A qualitative study into the attitudes and perceptions of patients'.

Lots of people have osteoporosis and sometime they need to take a medicine called a bisphosphonate to help strengthen your bones. You don't currently take one of these medicines, but sometimes if your osteoporosis gets worse then doctors might prescribe it for you. These medicines have been associated with a very rare side effect that can affect jawbones; however this condition is usually preventable with the right advice.

We would like to speak to patients to get a better understanding of how you think healthcare professionals should be working together to prevent side-effects such as this.

If you have any worries about your condition, then please make an appointment with your usual doctor and they can give you the correct advice.

If you would like to take part in this study or want to know more about it, please read the information sheet which comes with this letter.

Kind regards,

[GP/Pharmacist]

## Invitation letter for interviews – patients with osteoporosis

I would like find out more about the **MAP-BRONJ** and I am happy for a member of the research team to contact me

**Contact details** *(Please enter your contact details below)*

Title: \_\_\_\_\_ Mr/Mrs/Ms/Miss *(please delete as appropriate)*

Name: \_\_\_\_\_

Telephone contact number: \_\_\_\_\_

A convenient time to call is: Between \_\_\_\_\_ and \_\_\_\_\_

**Please return this slip in the envelope provided. A member of research team will contact you on the contact number provided above.**
